# Supplementary material for: Differential Function of Endogenous and Exogenous Abscisic Acid during Bacterial Pattern-Induced Production of Reactive Oxygen Species in Arabidopsis
Source: MDPI journal article supplement (doi:10.3390/ijms20102544), 2019-05-23
Supplement: s1 [file s1]

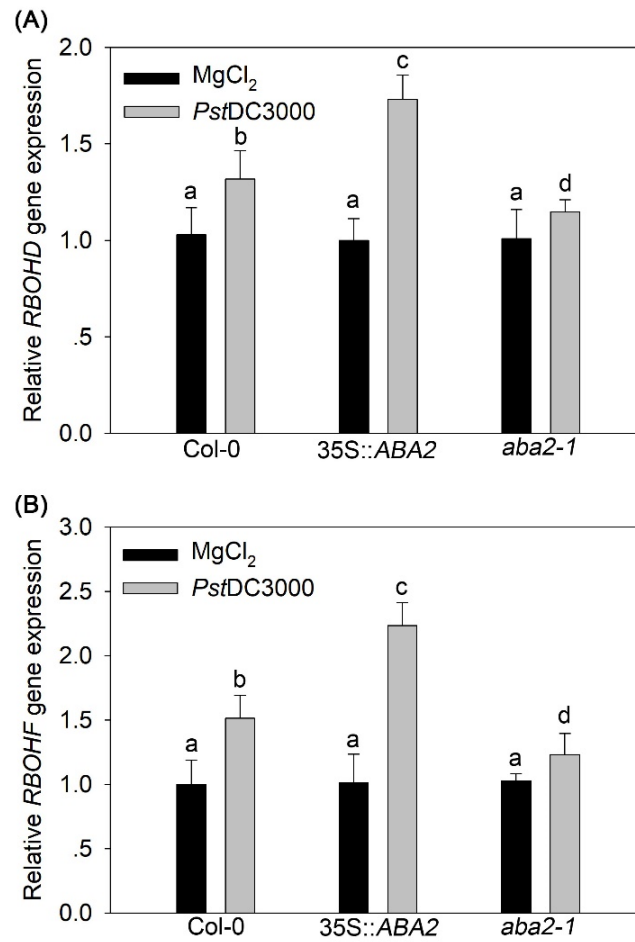

**Figure S1.** Effects of endogenous ABA on *RBOHD* (A) and *RBOHF* (B) transcripts under *PstDC3000* infection in *Arabidopsis*. Error bars indicate the standard error, and values were based on at least three independent replicates. Different letters indicate values that are significantly different ( $p < 0.05$ ) from each other as determined by one-way ANOVA. These experiments were performed at least three times.

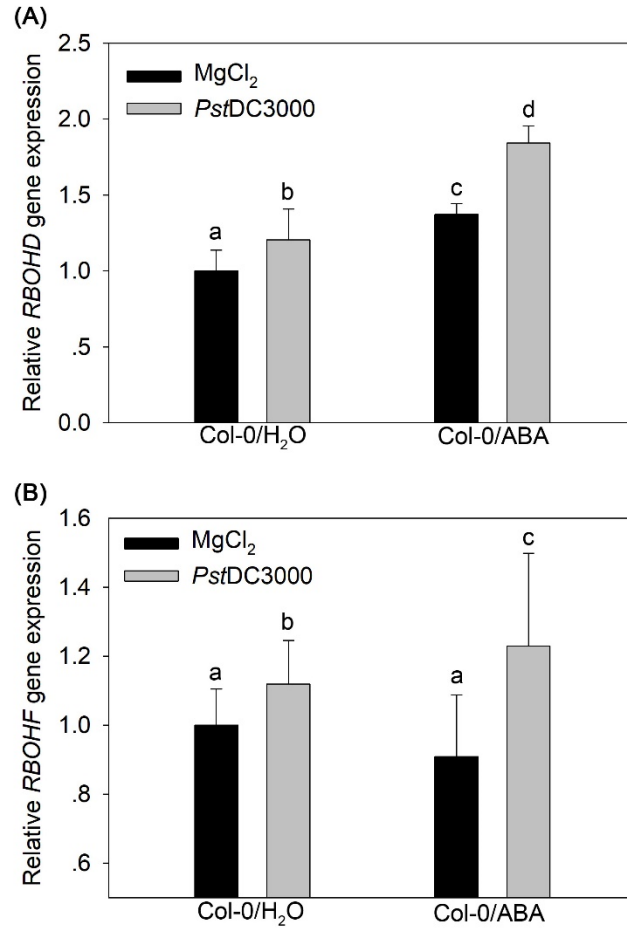

**Figure S2.** Effects of exogenous ABA on *RBOHD* (A) and *RBOHF* (B) transcripts under *PstDC3000* infection in *Arabidopsis*. Wild-type (Col-0) plants were treated with distilled water (H<sub>2</sub>O) or ABA before inoculation with *PstDC3000*. Error bars indicate the standard error, and values were based on at least three independent replicates. Different letters indicate values that are significantly different ( $p < 0.05$ ) from each other as determined by one-way ANOVA. These experiments were performed at least three times.

**Table S1. List of genotyping primers.**

| Mutant, Transgene, and RT-PCR | Primer Name: Sequence (5'→3')   |
|-------------------------------|---------------------------------|
| <i>rbohD</i>                  | rbohD-F: CCATTTAACGTGTGATTT     |
|                               | rbohD-R: TCCATGTCGTTTTCTGAT     |
| <i>rbohF</i>                  | rbohF-F: AACGATTCTCATGGTCTC     |
|                               | rbohF-R: CTATGCATTGAGCGAAAT     |
| 35S::ABA2                     | 35SABA2-F: CTCTGCCGACAGTGGTCC   |
|                               | 35SABA2-R: CACACCTCACCTCCGAGA   |
| <i>PR1</i>                    | qpr1-F: TACTGGCTATTCTCGATT      |
|                               | qpr1-R: CGTAAGGCCCACCAGAGT      |
| <i>RBOHD</i>                  | qrbohD-F: ATTAGTCTTAGTGCTTCTGC  |
|                               | qrbohD-R: GTCTAAGCTTCTGACTTAAC  |
| <i>RBOHF</i>                  | qrbohF-F: GAGTGCATCTGCAAATAAGC  |
|                               | qrbohF-R: CATTCTATGTATTCTGACTCT |
